# Supplementary material for: The acoustic repertoire of the Atlantic Forest Rocket Frog and its consequences for taxonomy and conservation (Allobates, Aromobatidae)
Source: PubMed Central journal article supplement (PMC5672738; doi:10.3897/zookeys.692.12187), 2017-08-21
Supplement: zookeys-692-141-s001.pdf [file zookeys-692-141-s001.pdf]

## Supplementary material

**Table S1.** List of acoustic traits analyzed and the Raven functions used for their measurements.

| <b>Acoustic trait</b>                                       | <b>Raven function for measurement</b>                                                      |
|-------------------------------------------------------------|--------------------------------------------------------------------------------------------|
| Note duration (s)                                           | Delta time                                                                                 |
| Minimum frequency (Hz)                                      | Frequency 5% (minimum frequency, ignoring 5% below the total energy in the selected call)  |
| Peak of dominant frequency (Hz)                             | Peak frequency                                                                             |
| Maximum frequency (Hz)                                      | Frequency 95% (maximum frequency, ignoring 5% above the total energy in the selected call) |
| Frequency bandwidth (as maximum subtracted by minimum) (Hz) | Bandwidth 90% (band frequency that includes 90% of the energy of the sound)                |

**Table S2.** Results of Fisher LSD analysis comparing notes duration among Atlantic Forest Rocket Frogs populations.

| Interaction                        | Difference | Statistic test | <i>P</i> level     |
|------------------------------------|------------|----------------|--------------------|
| Igrapiúna x Ituberá                | 0.00997    | 3.452          | <b>0.00063</b>     |
| Igrapiúna x Passo de Camaragibe    | 0.02005    | 9.463          | <b>0.E+0</b>       |
| Igrapiúna x Porto Seguro           | -0.00228   | 0.967          | 0.33381            |
| Igrapiúna x Teresópolis            | -0.00412   | 1.478          | 0.00251            |
| Ituberá x Passo de Camaragibe      | 0.01008    | 3.047          | 0.14019            |
| Ituberá x Porto Seguro             | -0.01225   | 3.537          | <b>0.00047</b>     |
| Ituberá x Teresópolis              | -0.01409   | 3.738          | <b>0.00022</b>     |
| Passo de Camaragibe x Porto Seguro | -0.02233   | 7.825          | <b>8.01581E-14</b> |
| Passo de Camaragibe x Teresópolis  | -0.02417   | 7.512          | <b>6.24167E-13</b> |
| Porto Seguro x Teresópolis         | -0.00184   | 0.544          | 0.58663            |

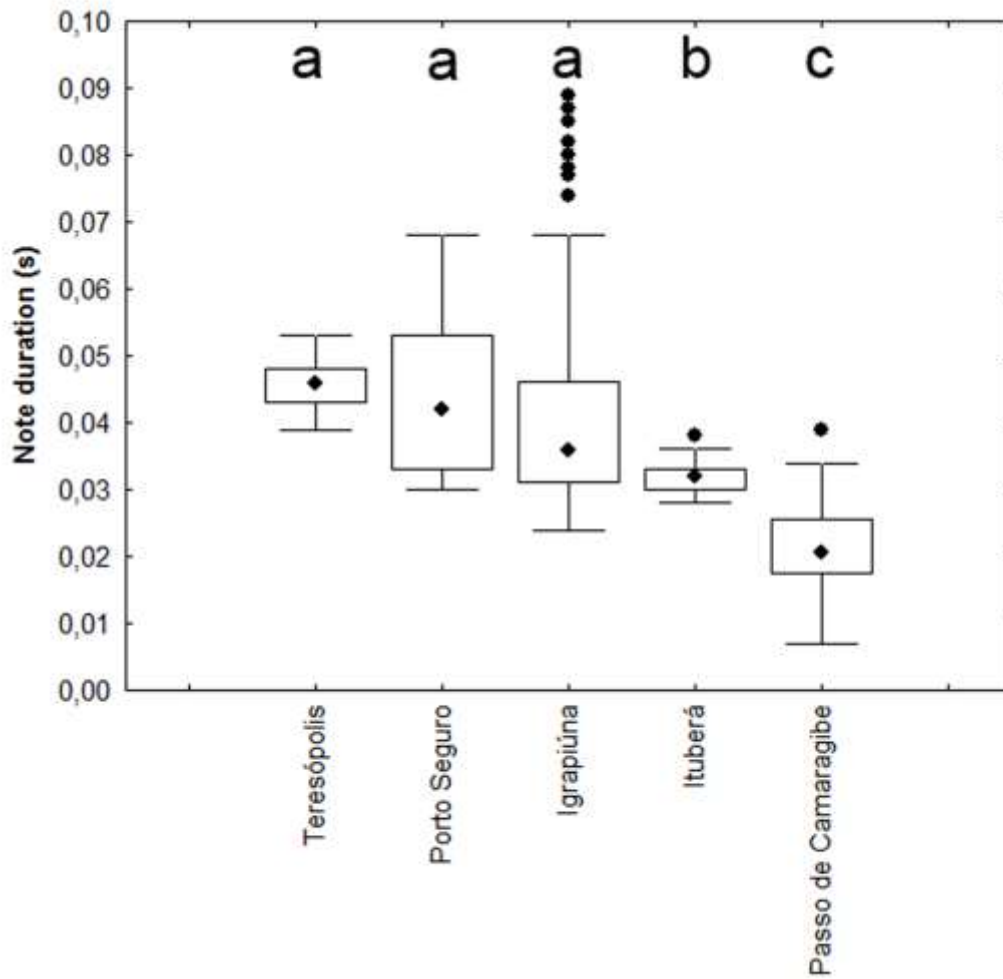

**Figure S1.** Note duration variation among Atlantic Forest Rocket Frogs populations. Box plot configuration = diamond: median, whiskers: non-outlier ranges, circles: outliers, box: 25% - 75% of data distribution. Letters a, b and c indicate statistical differences.
